# Supplementary material for: Mono-, tri- and polynuclear copper(ii) complexes of Schiff-base ligands: synthesis, characterization and catalytic activity towards alcohol oxidation
Source: Royal Society of Chemistry journal article supplement (doi:10.1039/c7nj00846e), 2017-01-01
Supplement: c7nj00846e1.pdf [file c7nj00846e1.pdf]

**Electronic Supplementary Information**

**Mono-, tri- and polynuclear copper(II) complexes of Schiff-base ligands:  
Synthesis, characterization and catalytic activity towards alcohol oxidation**

Aradhita Bhattacharjee,<sup>a</sup> Shibashis Halder,<sup>a</sup> Koushik Ghosh,<sup>a</sup> Corrado Rizzoli<sup>b</sup> and Partha Roy\*<sup>a</sup>

<sup>a</sup> Department of Chemistry, Jadavpur University, Jadavpur, Kolkata-700 032, India

E-mail: [proy@chemistry.jdvu.ac.in](mailto:proy@chemistry.jdvu.ac.in)

<sup>b</sup> Università degli Studi di Parma, Dipartimento S.C.V.S.A., Parco Area delle Scienze 17/A, I-43124 Parma, Italy

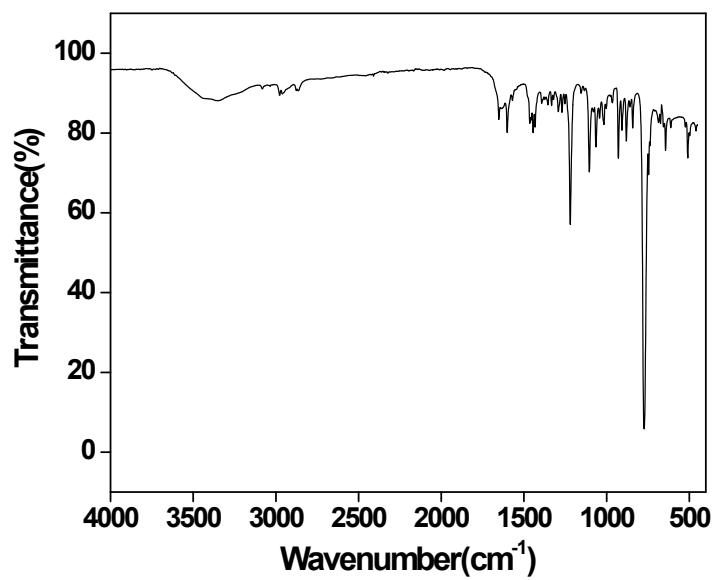

Fig. s1: FT-IR of complex 1

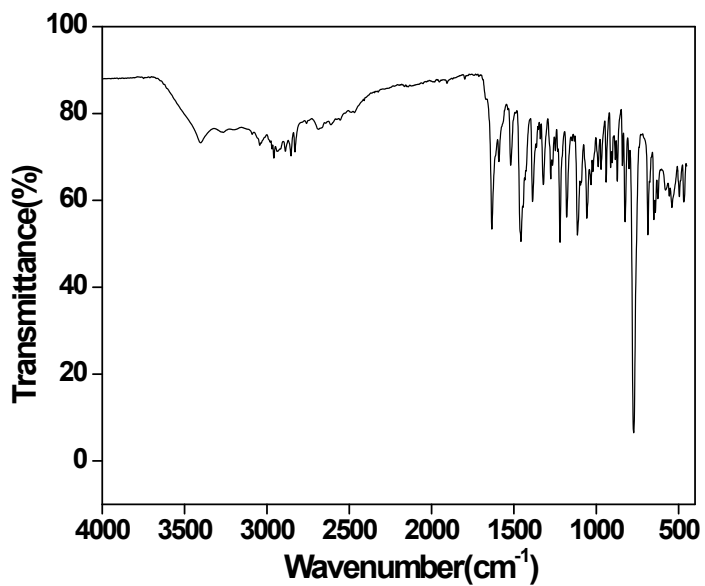

Fig. s2: FT-IR of complex 2

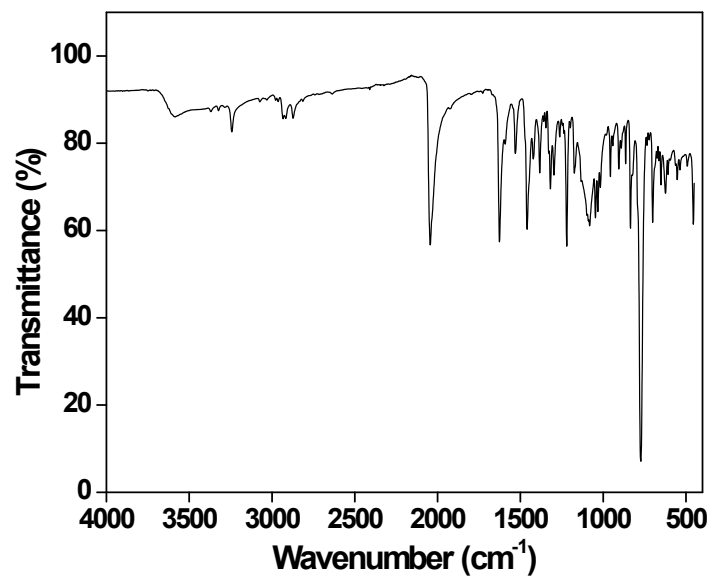

Fig. s3: FT-IR of complex 3

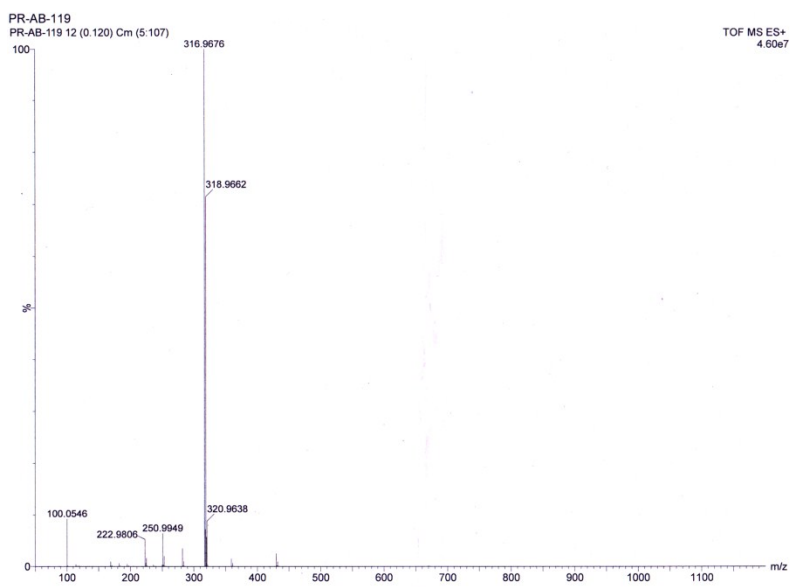

Fig. s4: ESI-mass spectrum of complex 1 in methanol

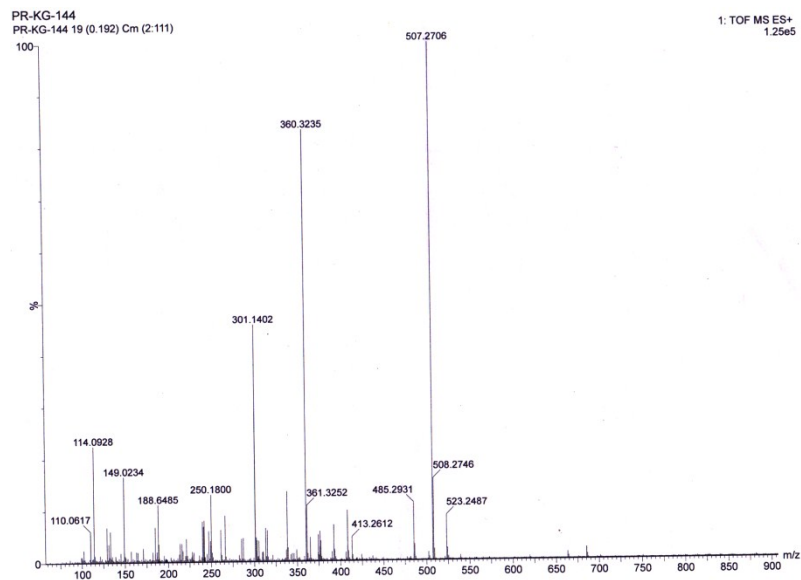

Fig. s5: ESI-mass spectrum of complex **2** in methanol

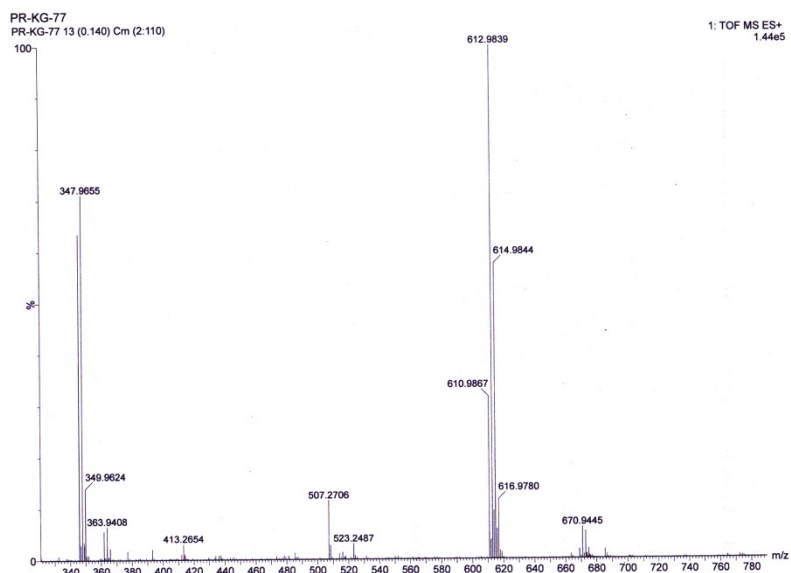

Fig. s6: ESI-mass spectrum of complex **3** in methanol

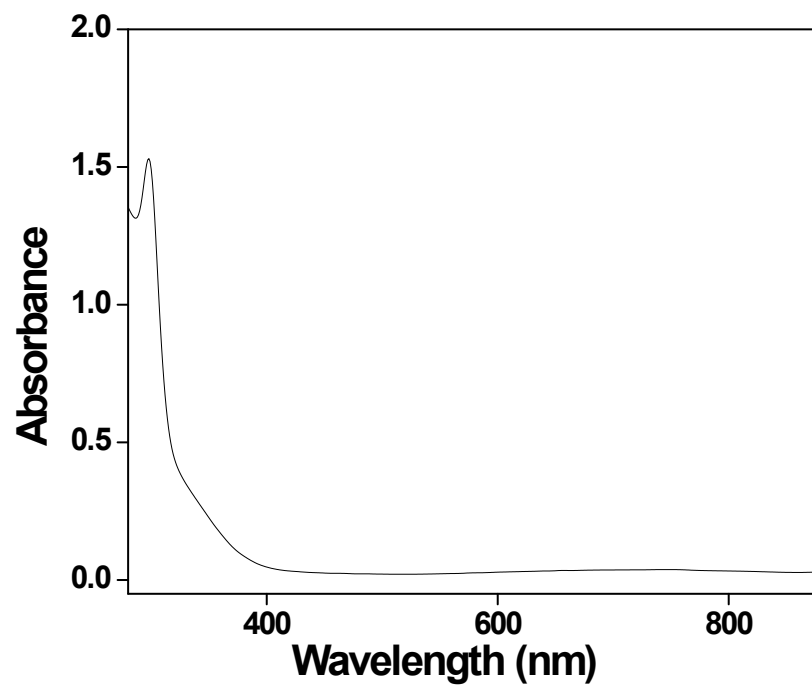

Fig. s7: UV-vis spectrum of complex 1 in methanol at room temperature

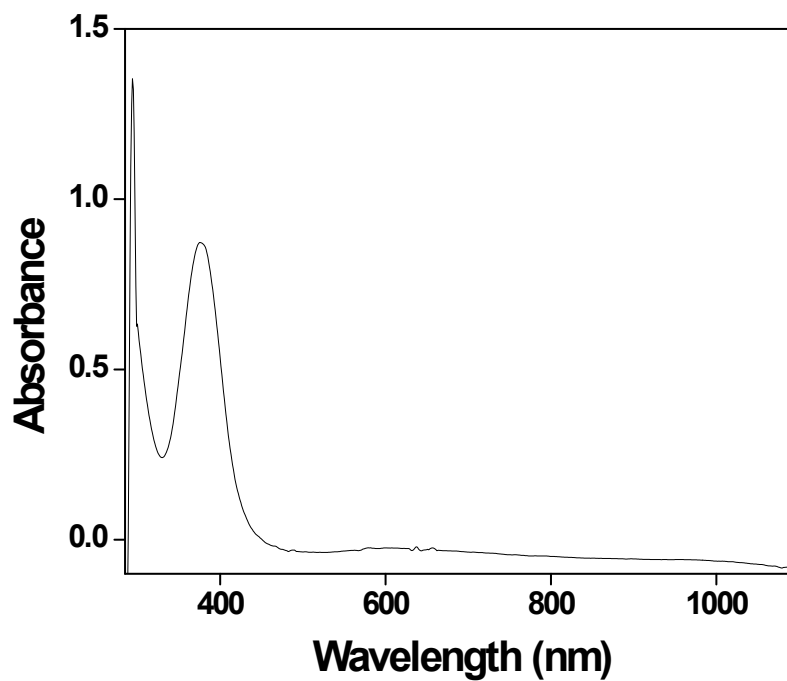

Fig. s8: UV-vis spectrum of complex 2 in methanol at room temperature

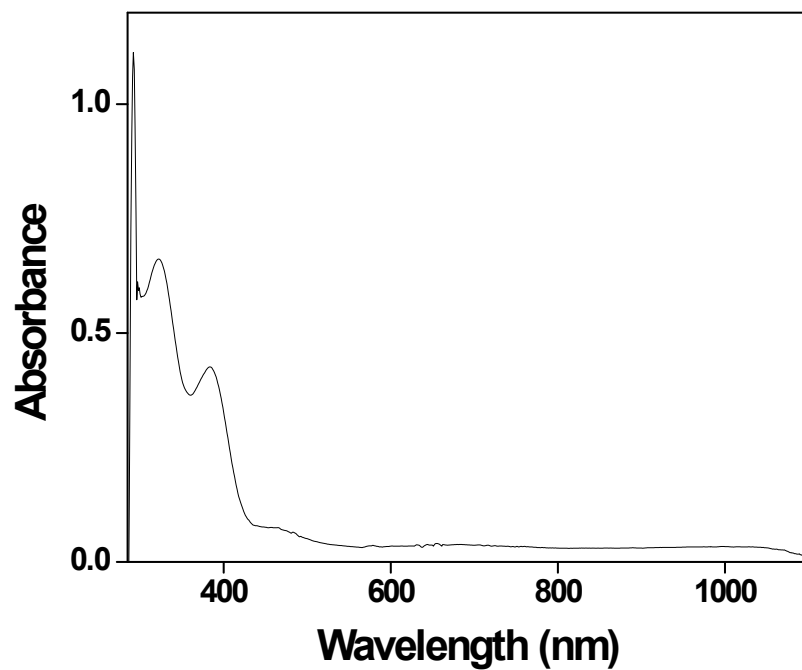

Fig. s9: UV-vis spectrum of complex 3 in methanol at room temperature

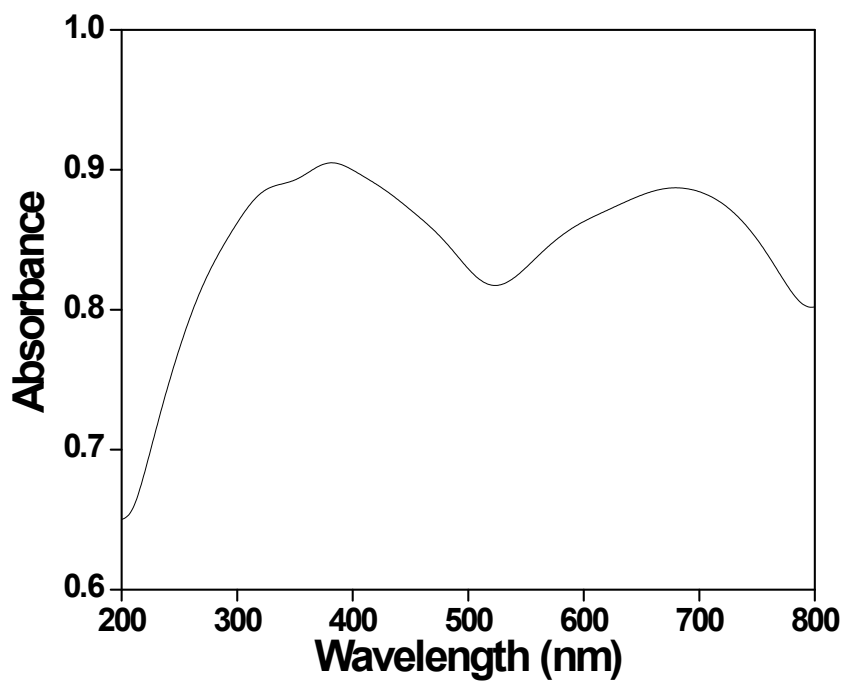

Fig. s10: UV-vis spectrum of complex 2 in solid state at room temperature

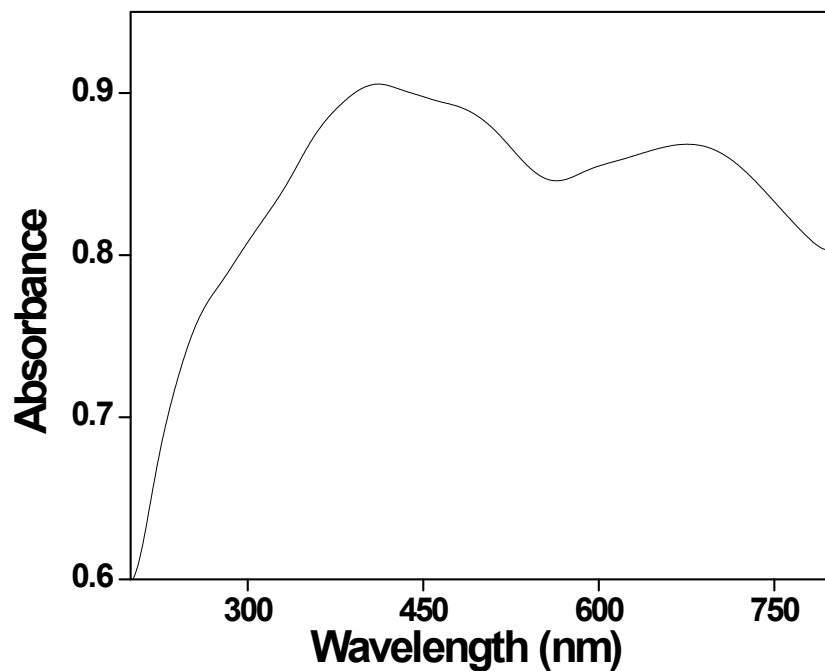

Fig. s11: UV-vis spectrum of complex 3 in solid state at room temperature

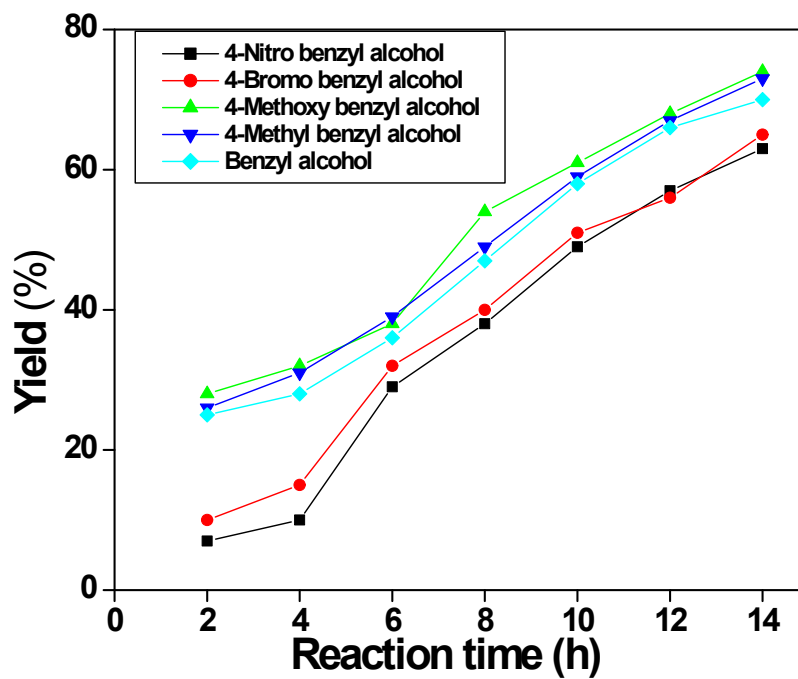

Fig. s12: Plot of yield vs reaction time for complex 2.

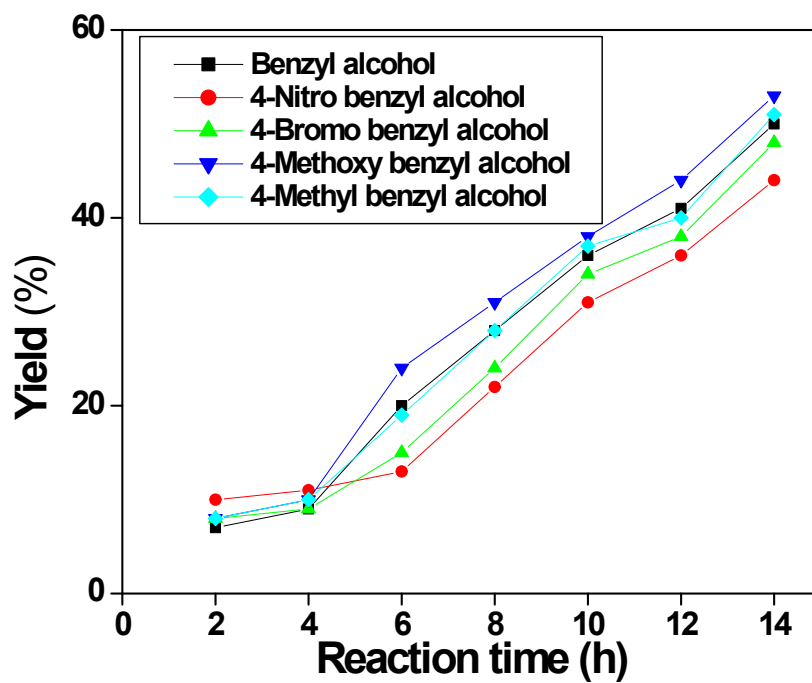

Fig. s13: Plot of yield vs reaction time for complex 3.



**Table S1.** Hydrogen bonding geometry (Å, °) for complex 1.

| D–H···A                                                                                          | D–H  | H···A | D···A     | ∠ D–H···A |
|--------------------------------------------------------------------------------------------------|------|-------|-----------|-----------|
| C24–H24A...Cl3                                                                                   | 0.97 | 2.77  | 3.430(9)  | 126.1     |
| C2–H2...O1 <sup>i</sup>                                                                          | 0.93 | 2.55  | 3.257(12) | 132.8     |
| C7–H7A...Cl1 <sup>ii</sup>                                                                       | 0.97 | 2.79  | 3.490(12) | 130.0     |
| C11–H11A...Cl4 <sup>iii</sup>                                                                    | 0.97 | 2.83  | 3.768(10) | 163.8     |
| C14–H14...O2 <sup>iv</sup>                                                                       | 0.93 | 2.54  | 3.268(11) | 135.3     |
| Symmetry codes: (i) 1/2+x, 1-y, z; (ii) x, -1+y,z; (iii) 1/2-x, 1+y, -1/2+z; (iv) -0.5+x, -y, z. |      |       |           |           |

**Table S2.** Hydrogen bonding geometry (Å, °) for complex 2.

| D–H···A                                                                                              | D–H  | H···A | D···A    | ∠ D–H···A |
|------------------------------------------------------------------------------------------------------|------|-------|----------|-----------|
| C2–H2...Cl2 <sup>i</sup>                                                                             | 0.93 | 2.69  | 3.396(3) | 133.0     |
| C7–H7...Cl2 <sup>ii</sup>                                                                            | 0.93 | 2.72  | 3.574(3) | 152.9     |
| C9–H9A...Br1 <sup>iii</sup>                                                                          | 0.93 | 2.92  | 3.696(3) | 138.2     |
| C10–H10B...Cl1 <sup>iv</sup>                                                                         | 0.97 | 2.80  | 3.724(3) | 158.5     |
| Symmetry codes: (i) -x, 1-y, 1-z; (ii) 1/2+x, 0.5-y, 1-z; (iii) x, 1/2-y, 1/2+z; (iv) 1-x, 1-y, 1-z. |      |       |          |           |

**Table S3.** Hydrogen bonding geometry (Å, °) for complex 3.

| D–H···A                                                        | D–H     | H···A   | D···A    | ∠ D–H···A |
|----------------------------------------------------------------|---------|---------|----------|-----------|
| N2–H1...N52 <sup>i</sup>                                       | 0.79(7) | 2.47(6) | 3.117(9) | 139(5)    |
| C3–H3...N5 <sup>ii</sup>                                       | 0.93    | 2.53    | 3.331(7) | 145.0     |
| Symmetry codes: (i) x, 1-y, 1/2+z; (ii) -1/2+x, 3/2-y, -1/2+z. |         |         |          |           |
